# Supplementary material for: Selective Oxidation of Toluene to Benzaldehyde Using Co-ZIF Nano-Catalyst
Source: MDPI journal article supplement (doi:10.3390/ijms232112881), 2022-10-25
Supplement: s1 [file s1]

# Selective Oxidation of Toluene to Benzaldehyde Using Co-ZIF Nano-Catalyst

Wei Long <sup>1,2,\*</sup>, Zhilong Chen <sup>1</sup>, Yinfei Huang <sup>3</sup> and Xinpeng Kang <sup>1</sup>

<sup>1</sup> College of Chemistry, Guangdong University of Petrochemical Technology, Maoming 525000, China

<sup>2</sup> Guangdong Provincial Key Laboratory of Petrochemical Pollution Process and Control, Guangdong University of Petrochemical Technology, Maoming 525000, China

<sup>3</sup> College of Electromechanical Engineering, Guangdong University of Petrochemical Technology, Maoming 525000, China

\* Correspondence: longwei@gdupt.edu.cn. Tel.: +86-0668-2337639.

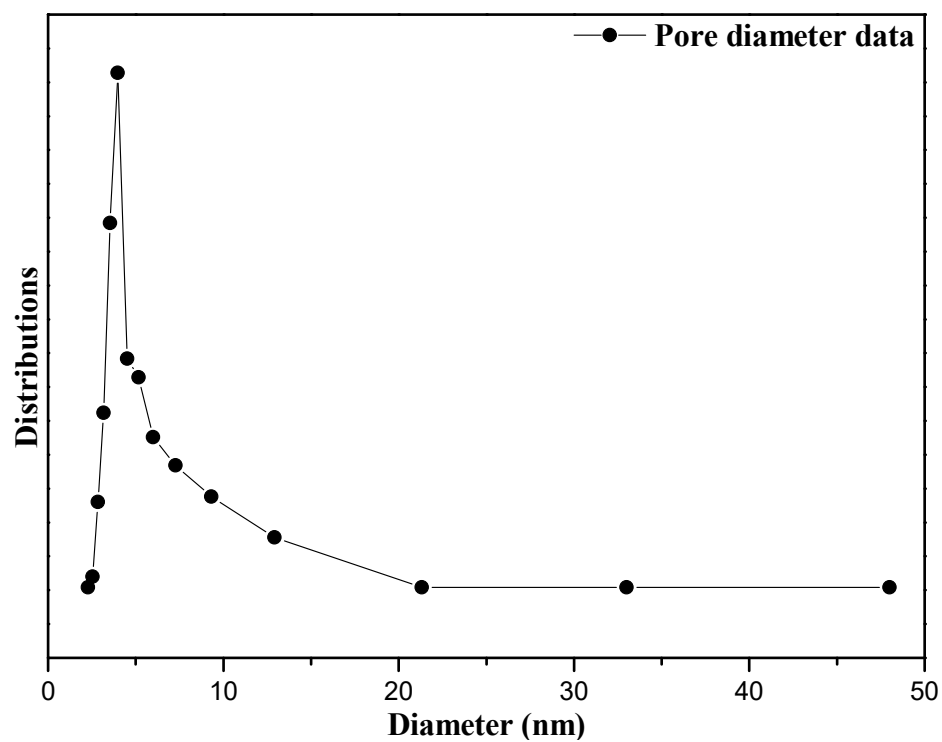

Figure S1. Pore size distributions of the Co-ZIF catalyst.

**Table S1** Effects of the mass amount of the Co-ZIF catalyst.

| The mass amount<br>of catalyst (g) | Conversion<br>(%) | Selectivity (%) |              |              |        |
|------------------------------------|-------------------|-----------------|--------------|--------------|--------|
|                                    |                   | Benzyl alcohol  | Benzaldehyde | Benzoic acid | Others |
| 0.16                               | 87.76             | 12.19           | 79.76        | 3.42         | 4.63   |
| 0.18                               | 90.46             | 8.13            | 80.18        | 4.78         | 6.91   |
| 0.20                               | 92.30             | 3.42            | 91.31        | 5.13         | 0.14   |
| 0.22                               | 93.55             | 2.37            | 88.75        | 6.01         | 2.87   |
| 0.24                               | 94.49             | 1.16            | 86.49        | 8.78         | 3.57   |

Reaction conditions 0.500 mmol toluene, 20 mL HFIP, 0.004 g NHPI, 0.12 MPa O<sub>2</sub>, 313 K and 240 min.

**Table S2** Effects of solvent.

| Solvent          | Conversion<br>(%) | Selectivity (%) |              |              |        |
|------------------|-------------------|-----------------|--------------|--------------|--------|
|                  |                   | Benzyl alcohol  | Benzaldehyde | Benzoic acid | Others |
| acetone          | 14.35             | 43.25           | 21.46        | 23.57        | 11.72  |
| cyclohexane      | 12.34             | 34.68           | 13.47        | 37.65        | 14.20  |
| trichloromethane | 25.46             | 25.68           | 31.49        | 29.42        | 13.41  |
| ethyl acetate    | 36.72             | 31.45           | 30.27        | 29.41        | 8.87   |
| ethanol          | 62.89             | 26.77           | 29.43        | 32.56        | 11.24  |
| tetrahydrofuran  | 57.96             | 22.38           | 32.71        | 26.92        | 17.99  |
| DMF              | 63.12             | 30.46           | 35.46        | 24.59        | 9.49   |
| isopropanol      | 82.35             | 12.92           | 61.63        | 15.51        | 9.94   |
| HFIP             | 92.30             | 3.42            | 91.31        | 5.13         | 0.14   |

Reaction conditions 0.20 g Co-ZIF, 0.500 mmol toluene, 20 mL HFIP, 0.004 g NHPI, 0.12 MPa O<sub>2</sub>, 313 K and 240 min.
